# Supplementary material for: Acetylcholinesterase inhibitors attenuate angiogenesis
Source: Oxford University Press journal article supplement (doi:10.1042/cs20110633), 2012-02-29
Supplement: cs1230241add.pdf [file cs1230241add.pdf]

## ■ SUPPLEMENTARY ONLINE DATA

# Acetylcholinesterase inhibitors attenuate angiogenesis

**Ryohei MIYAZAKI\***, **Toshihiro ICHIKI\*†**, **Toru HASHIMOTO\***, **Jiro IKEDA\***,  
**Aya KAMIHARAGUCHI\***, **Eriko NARABAYASHI\***, **Hirohide MATSUURA\***,  
**Kotaro TAKEDA\*†** and **Kenji SUNAGAWA\***

\*Departments of Cardiovascular Medicine, Kyushu University Graduate School of Medical Sciences, Fukuoka, Japan, and

†Advanced Therapeutics for Cardiovascular Diseases, Kyushu University Graduate School of Medical Sciences, Fukuoka, Japan

**Table S1 Sequences of the primers used in real-time PCR**

Angpt 1 and 2, angiotensin II type 1 and 2; PIGF, placental growth factor.

| Gene           | Sequence (5'→3')         |                          |
|----------------|--------------------------|--------------------------|
|                | Forward                  | Reverse                  |
| TNF $\alpha$   | AAGCCTGTAGCCACGTCGTA     | GGCACCAGTGTGGTGTCTTTG    |
| IL-1 $\beta$   | GCAACTGTTCTCAACTCAACT    | ATCTTTGGGGTCCGCTCAACT    |
| IL-6           | CCACTTCACAAGTCGGAGGCTTA  | GCAAGTGCATCATCGTTGTCATAC |
| VEGF           | GCACATAGGAGAGATGAGCTTCC  | CTCCGCTCTGAACAAGGCT      |
| Angpt1         | CCGAGCCTACTCACAGTACGACAG | AAATCGGCACCGTGAAGATCAA   |
| Angpt2         | GGACAGTCATCCAACCCGAGA    | CAAACTCATTGCCAGCCAGTA    |
| PDGF           | CAAAGGCAAGCACCGAAAGTTTA  | CCGAATCAGGCATCGAGACA     |
| bFGF           | GTGCCAACCGGTACTTGCTA     | TCAGTGCCACATACCACTGGAG   |
| PIGF           | CCTGTCTGCTGGGAACAACCTCA  | CACCTCATCAGGGTATTCCCAAG  |
| CD3 $\epsilon$ | CACTCTGGGCTTGCTGATGG     | TCATAGTCTGGGTGGGAACAGG   |
| F4/80          | GAGATTGTGGAAGCATCCGAGAC  | GATGACTGTACCCATGGCTGA    |
| $\beta$ -Actin | GGCTGTATCCCTCCATCG       | CCAGTTGGTAACAATGCCATG    |

**Table S3 HR, BP and body weight in the experimental groups treated with donepezil with or without IL-1 $\beta$**

Results are means  $\pm$  S.E.M.

| Group                    | HR (beats/min) | SBP (mmHg)  | Body weight (g) |
|--------------------------|----------------|-------------|-----------------|
| Control + PBS            | 531 $\pm$ 21   | 104 $\pm$ 6 | 24.1 $\pm$ 0.5  |
| Donepezil + PBS          | 490 $\pm$ 26   | 100 $\pm$ 4 | 23.7 $\pm$ 1.7  |
| Donepezil + IL-1 $\beta$ | 501 $\pm$ 8    | 105 $\pm$ 3 | 23.6 $\pm$ 0.6  |

**Table S2 HR, BP and body weight in the experimental groups**

Results are means  $\pm$  S.E.M. \* $P$  < 0.05 compared with control.

| Group         | HR (beats/min) | SBP (mmHg)   | Body weight (g) |
|---------------|----------------|--------------|-----------------|
| Control       | 555 $\pm$ 34   | 101 $\pm$ 10 | 24.8 $\pm$ 0.8  |
| Donepezil     | 452 $\pm$ 31*  | 97 $\pm$ 6   | 23.3 $\pm$ 0.3  |
| Physostigmine | 501 $\pm$ 20   | 100 $\pm$ 2  | 23.2 $\pm$ 0.7  |
| Nicotine      | 522 $\pm$ 56   | 101 $\pm$ 17 | 24.3 $\pm$ 1.9  |
| Betahnechol   | 472 $\pm$ 47   | 95 $\pm$ 8   | 23.8 $\pm$ 1.9  |

Received 6 December 2011/26 January 2012; accepted 28 February 2012  
 Published as Immediate Publication 28 February 2012, doi:10.1042/CS20110633
